# Supplementary material
Source: Springer Nature journal article supplement (https://www.springermedizin.de/resource/supplementary/12885_2005_526_MOESM2_ESM.pdf/9469686)
Supplement: MOESM2 [file 9469686]

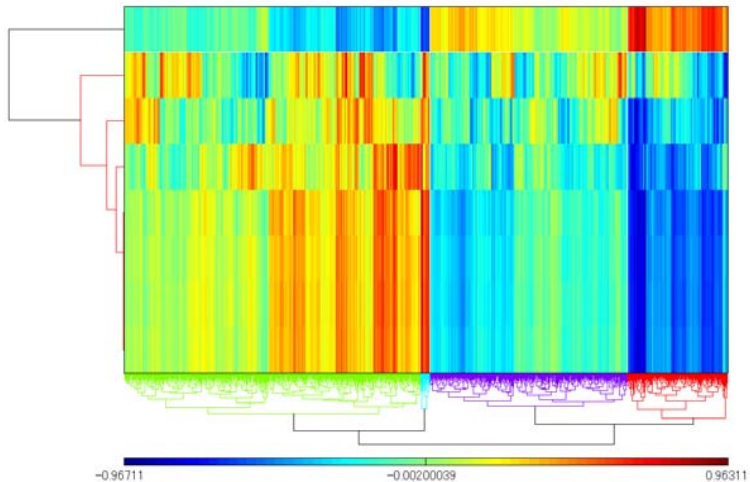

GEM  
 CBDCA  
 PAC  
 DOC  
 5-FU  
 CDDP  
 VIN  
 SN-38

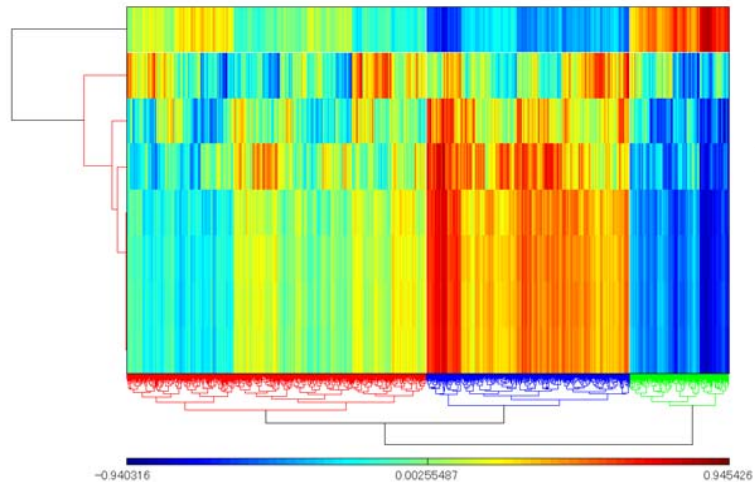

GEM  
 CBDCA  
 PAC  
 DOC  
 5-FU  
 CDDP  
 VIN  
 SN-38

**(A) filter Array Data**

**(B) Affymetrix Data**
